# Supplementary material for: iRGD‐modified exosomes effectively deliver CPT1A siRNA to colon cancer cells, reversing oxaliplatin resistance by regulating fatty acid oxidation
Source: PubMed Central journal article supplement (PMC8637580; doi:10.1002/1878-0261.13052), 2021-07-22

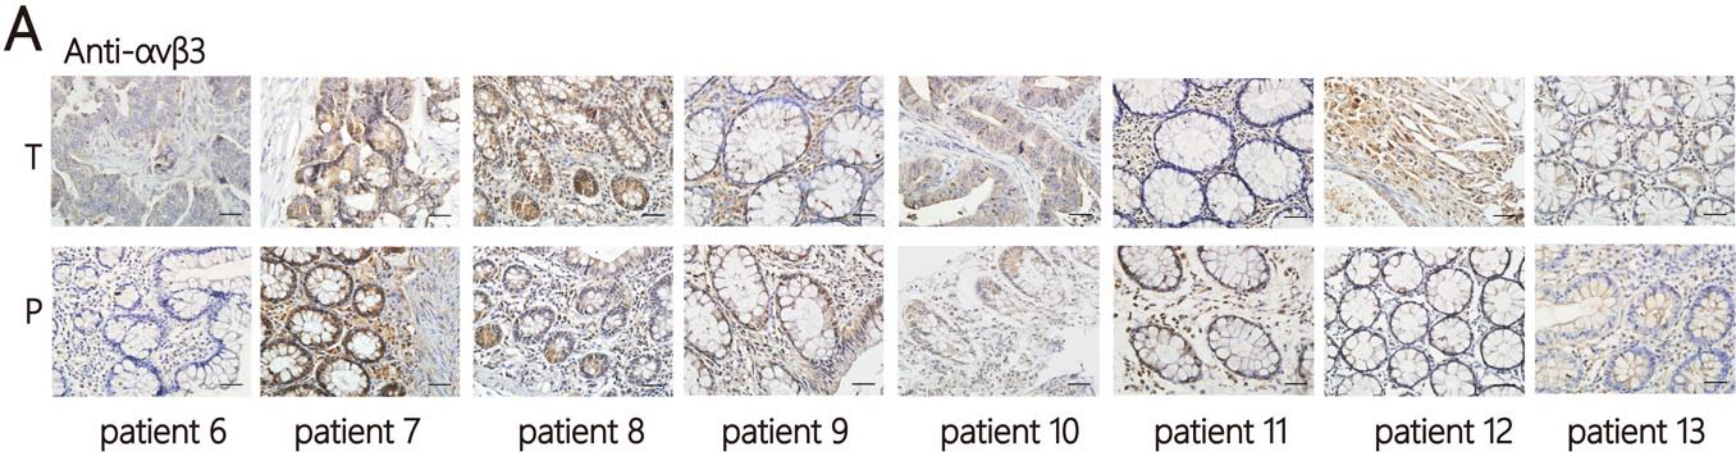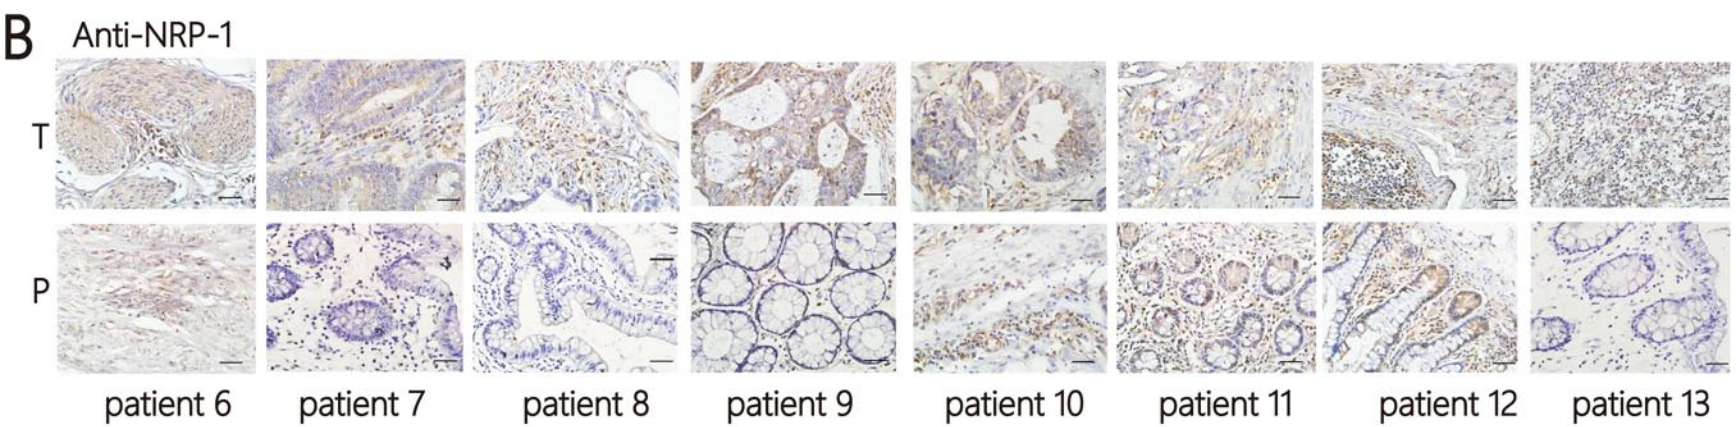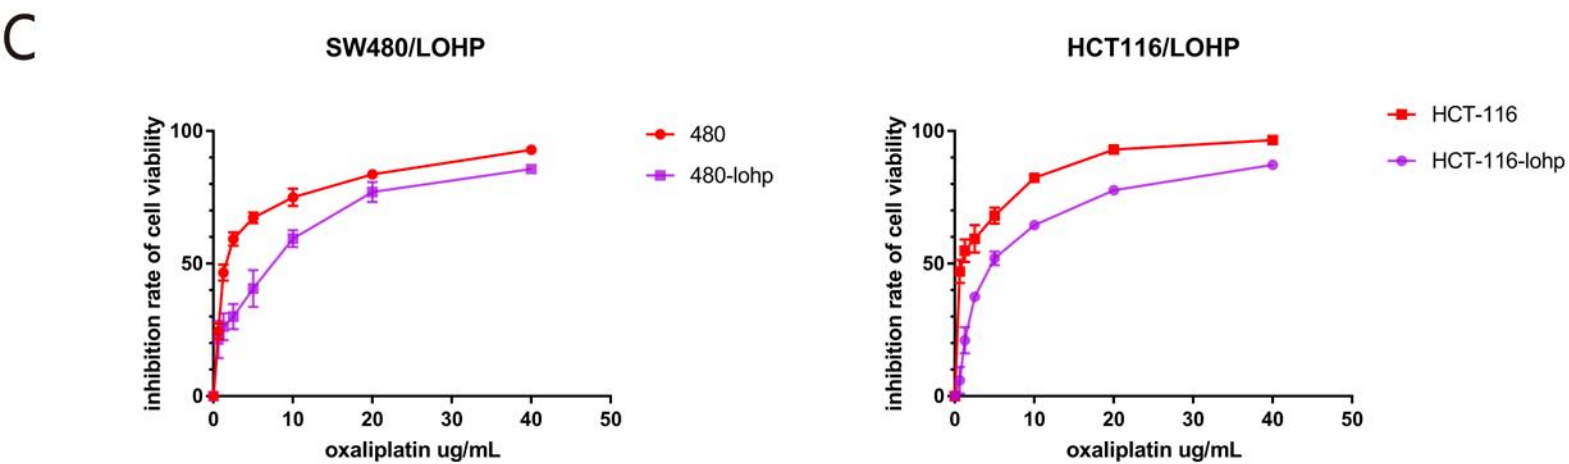

Supplement: MOL2-15-3430-s001.pdf [file MOL2-15-3430-s001.pdf]
